# Supplementary material for: In silico engineering of Pseudomonas metabolism reveals new biomarkers for increased biosurfactant production
Source: PeerJ. 2018 Dec 17;6:e6046. doi: 10.7717/peerj.6046 (PMC6301282; doi:10.7717/peerj.6046)
Supplement: Supplemental Information 5 [file peerj-06-6046-s005.xlsx]

## Sheet: PCA - Reactions Contributions
	Dim.1	Dim.2	Dim.3	Dim.4	Dim.5				Dim.1	Dim.2	Dim.3	Dim.4	Dim.5				PC1	PC2	PC3	PC4	PC5
RR04090	0.0511918	0.0615169	0.196056	0.00175711	0.0266109			RR08593	23.8784	0.683118	0.878262	0.575296	0.0396985			RR08593	23.878	0.683	0.878	0.575	0.04
RR09712	0.0134018	0.0134526	0.219061	0.000100589	2.45504e-07			RR08674	22.9802	9.95624	2.13027	3.31571	0.37591			RR08674	22.98	9.956	2.13	3.316	0.376
RR00767	0.0195448	0.00106089	0.0139177	0.000966081	0.00992			EX_EC0001	17.6509	7.97243	2.22271	0.259705	0.772266			EX_EC0001	17.651	7.972	2.223	0.26	0.772
RR04093	0.0511918	0.0615169	0.196056	0.00175711	0.0266109			EX_EC0007	5.95176	8.45602	0.0151091	0.201396	0.09611			EX_EC0007	5.952	8.456	0.015	0.201	0.096
RR00511	0.00329723	0.0198985	0.0466535	0.634294	0.509239			IR10022	5.75781	0.400995	17.8614	0.123973	0.568753			IR10022	5.758	0.401	17.861	0.124	0.569
RR04087	0.0134018	0.0134526	0.219061	0.000100589	2.45504e-07			RR08670	4.39993	7.70551	0.00953759	0.231042	0.224344			RR04368	0.963	9.394	10.448	0.323	0.162
RR00689	0.0210101	0.0029435	0.000890898	0.661406	0.20228			RR08672	2.27869	3.60845	5.60427	0.332657	1.01512
RR04086	0.0511918	0.0615169	0.196056	0.00175711	0.0266109			EX_EC0011	1.36308	3.12424	5.48531	0.370456	0.712176
RR03487	0.0245349	0.0279616	0.014604	0.0140634	0.0188861			IR10069	1.24159	0.122241	4.4387	0.0282499	0.17471
RR01725	0.000269564	0.4643	1.1085	0.243954	0.291639			IR08605	1.09912	0.0546955	0.240296	0.0134202	0.00825828
RR00739	0.0511918	0.0615169	0.196056	0.00175711	0.0266109			RR04368	0.963135	9.39431	10.4478	0.323058	0.162243
RR04095	0.0511918	0.0615169	0.196056	0.00175711	0.0266109			RR00703	0.766	2.95993	0.237856	0.151745	0.00870543
RR00674	0.0245349	0.0279616	0.014604	0.0140634	0.0188861			IR00001	0.751993	0.0351957	0.00457145	0.171089	0.43194
RR03675	0.0565458	3.31305	0.14743	0.946918	0.0170954			RR08939	0.68278	0.0185976	0.0781652	0.0812307	0.270702
RR00131	0.00356524	0.00286573	0.350333	0.35972	0.00268971			EX_EC0009	0.68278	0.0185976	0.0781652	0.0812307	0.270702
RR00181	0.140637	0.965033	0.907538	0.235609	0.148752			EX_EC0957	0.68278	0.0185976	0.0781652	0.0812307	0.270702
RR00681	0.223347	0.0241651	0.0107386	0.460685	0.447552			RR01071	0.519295	0.946781	0.333829	0.752589	0.133168
RR01048	0.24866	0.00123733	0.0213468	0.0226439	0.0906322			RR08879	0.425114	1.6312	0.192484	0.00154383	0.084025
RR00685	0.0108635	3.81115	0.128674	0.885871	0.0010809			RR00464	0.360702	0.000162477	0.0305303	1.76703	1.12432
RR02322	0.0511918	0.0615169	0.196056	0.00175711	0.0266109			RR00179	0.359997	2.38815	1.81053	0.225629	0.229002
RR04097	0.0134018	0.0134526	0.219061	0.000100589	2.45504e-07			RR08739	0.311774	0.417847	0.118128	0.0286051	12.3155
RR04368	0.963135	9.39431	10.4478	0.323058	0.162243			EX_EC0098	0.311774	0.417847	0.118128	0.0286051	12.3155
RR00690	0.0330787	0.829101	0.00639285	0.226287	0.411699			IR08984	0.31149	0.202953	0.292349	0.0528638	0.284095
RR02374	0.000269564	0.4643	1.1085	0.243954	0.291639			RR00219	0.284293	2.52302	0.213854	0.127919	0.0660118
RR04094	0.0134018	0.0134526	0.219061	0.000100589	2.45504e-07			EX_Rsuc	0.260427	0.0250086	0.483806	5.96641	6.04109
RR04305	0.188388	0.00159764	0.0497506	0.00053072	0.157692			TRSuc	0.260427	0.0250086	0.483806	5.96641	6.04109
RR01292	0.0245349	0.0279616	0.014604	0.0140634	0.0188861			RR01048	0.24866	0.00123733	0.0213468	0.0226439	0.0906322
RR03681	0.0565458	3.31305	0.14743	0.946918	0.0170954			RR01103	0.24866	0.00123733	0.0213468	0.0226439	0.0906322
RR09953	0.0134018	0.0134526	0.219061	0.000100589	2.45504e-07			RR00191	0.24866	0.00123733	0.0213468	0.0226439	0.0906322
RR08593	23.8784	0.683118	0.878262	0.575296	0.0396985			RR08812	0.23453	0.0720461	0.0646802	0.0640709	0.12721
RR08672	2.27869	3.60845	5.60427	0.332657	1.01512			RR08678	0.23453	0.0720461	0.0646802	0.0640709	0.12721
RR08879	0.425114	1.6312	0.192484	0.00154383	0.084025			RR00681	0.223347	0.0241651	0.0107386	0.460685	0.447552
RR08812	0.23453	0.0720461	0.0646802	0.0640709	0.12721			EX_EC0080	0.200853	0.0552334	0.0327504	0.553802	0.314128
RR01726	0.000269564	0.4643	1.1085	0.243954	0.291639			RR04305	0.188388	0.00159764	0.0497506	0.00053072	0.157692
RR04091	0.0134018	0.0134526	0.219061	0.000100589	2.45504e-07			EX_EC0027	0.177625	0.158263	0.00034964	5.50583	1.98839
RR00464	0.360702	0.000162477	0.0305303	1.76703	1.12432			RR00216	0.161388	0.0344375	0.38087	0.398988	0.0464341
RR03658	0.0408926	0.00989422	0.00859626	0.00396524	0.00409919			RR00818	0.143337	0.707257	0.363654	0.698278	0.0405202
RR10392	0.0408926	0.00989422	0.00859626	0.00396524	0.00409919			IR04564	0.143337	0.707257	0.363654	0.698278	0.0405202
RR01103	0.24866	0.00123733	0.0213468	0.0226439	0.0906322			RR00181	0.140637	0.965033	0.907538	0.235609	0.148752
RR00362	0.0108635	3.81115	0.128674	0.885871	0.0010809			RR01486	0.132998	0.0842133	0.0274017	0.00856315	2.93701
RR00652	0.0256469	0.606076	0.0110696	0.257643	0.228497			EX_EC0065	0.123795	0.809801	0.742681	0.202222	0.1141
RR08678	0.23453	0.0720461	0.0646802	0.0640709	0.12721			IR10367	0.115135	2.60905	17.8041	0.0501703	0.448029
RR01018	0.0388377	0.0347059	0.00303656	0.714292	0.0818709			RR02215	0.106018	0.66168	1.16232	0.21347	0.141686
RR00667	0.000513794	0.178283	0.0364016	0.00367827	3.52461			EX_EC0148	0.106018	0.66168	1.16232	0.21347	0.141686
RR00109	0.0245349	0.0279616	0.014604	0.0140634	0.0188861			IR00455	0.0965264	0.0147028	0.0132328	0.088353	3.84102
RR08739	0.311774	0.417847	0.118128	0.0286051	12.3155			IR08910	0.0898935	0.523126	0.000504007	0.622337	6.34877
RR03001	0.00318515	0.0204162	0.0466638	0.61959	0.516717			RR00079	0.0762918	1.2021	0.0964538	11.3461	1.36547
RR01150	0.0245349	0.0279616	0.014604	0.0140634	0.0188861			IR03520	0.0724232	1.43132	0.0136407	0.0399196	0.348603
RR00519	0.000513794	0.178283	0.0364016	0.00367827	3.52461			RR03675	0.0565458	3.31305	0.14743	0.946918	0.0170954
RR04092	0.0511918	0.0615169	0.196056	0.00175711	0.0266109			RR03681	0.0565458	3.31305	0.14743	0.946918	0.0170954
RR00708	0.0408926	0.00989422	0.00859626	0.00396524	0.00409919			RR04093	0.0511918	0.0615169	0.196056	0.00175711	0.0266109
RR00710	0.0195448	0.00106089	0.0139177	0.000966081	0.00992			RR04086	0.0511918	0.0615169	0.196056	0.00175711	0.0266109
RR01210	0.0195448	0.00106089	0.0139177	0.000966081	0.00992			RR00739	0.0511918	0.0615169	0.196056	0.00175711	0.0266109
RR00191	0.24866	0.00123733	0.0213468	0.0226439	0.0906322			RR04095	0.0511918	0.0615169	0.196056	0.00175711	0.0266109
RR09735	0.000269564	0.4643	1.1085	0.243954	0.291639			RR02322	0.0511918	0.0615169	0.196056	0.00175711	0.0266109
RR00079	0.0762918	1.2021	0.0964538	11.3461	1.36547			RR04092	0.0511918	0.0615169	0.196056	0.00175711	0.0266109
RR01071	0.519295	0.946781	0.333829	0.752589	0.133168			RR09715	0.0511918	0.0615169	0.196056	0.00175711	0.0266109
RR00216	0.161388	0.0344375	0.38087	0.398988	0.0464341			RR03551	0.0511918	0.0615169	0.196056	0.00175711	0.0266109
RR00179	0.359997	2.38815	1.81053	0.225629	0.229002			RR04088	0.0511918	0.0615169	0.196056	0.00175711	0.0266109
RR09715	0.0511918	0.0615169	0.196056	0.00175711	0.0266109			RR02157	0.0511918	0.0615169	0.196056	0.00175711	0.0266109
RR03551	0.0511918	0.0615169	0.196056	0.00175711	0.0266109			EX_EC3745	0.0511918	0.0615169	0.196056	0.00175711	0.0266109
RR02215	0.106018	0.66168	1.16232	0.21347	0.141686			RR04090	0.0511918	0.0615169	0.196056	0.00175711	0.0266109
RR04088	0.0511918	0.0615169	0.196056	0.00175711	0.0266109			RR03691	0.0497893	0.0939848	0.00952206	2.80352	0.427817
RR03769	0.0210101	0.0029435	0.000890898	0.661406	0.20228			RR03658	0.0408926	0.00989422	0.00859626	0.00396524	0.00409919
RR04089	0.0134018	0.0134526	0.219061	0.000100589	2.45504e-07			RR10392	0.0408926	0.00989422	0.00859626	0.00396524	0.00409919
RR02157	0.0511918	0.0615169	0.196056	0.00175711	0.0266109			RR00708	0.0408926	0.00989422	0.00859626	0.00396524	0.00409919
RR08670	4.39993	7.70551	0.00953759	0.231042	0.224344			RR01018	0.0388377	0.0347059	0.00303656	0.714292	0.0818709
RR08916	0.00224387	1.1741	0.671047	0.384315	0.365933			RR00690	0.0330787	0.829101	0.00639285	0.226287	0.411699
RR08939	0.68278	0.0185976	0.0781652	0.0812307	0.270702			IR00149	0.0283245	0.0842056	0.449307	5.81164	5.26354
RR00818	0.143337	0.707257	0.363654	0.698278	0.0405202			RSUC	0.0283245	0.0842056	0.449307	5.81164	5.26354
RR08674	22.9802	9.95624	2.13027	3.31571	0.37591			RR00652	0.0256469	0.606076	0.0110696	0.257643	0.228497
RR00703	0.766	2.95993	0.237856	0.151745	0.00870543			RR03487	0.0245349	0.0279616	0.014604	0.0140634	0.0188861
RR00219	0.284293	2.52302	0.213854	0.127919	0.0660118			RR00674	0.0245349	0.0279616	0.014604	0.0140634	0.0188861
RR00146	0.01629	0.0690482	0.129555	0.0110151	0.00897484			RR01292	0.0245349	0.0279616	0.014604	0.0140634	0.0188861
RR00111	0.0245349	0.0279616	0.014604	0.0140634	0.0188861			RR00109	0.0245349	0.0279616	0.014604	0.0140634	0.0188861
RR01486	0.132998	0.0842133	0.0274017	0.00856315	2.93701			RR01150	0.0245349	0.0279616	0.014604	0.0140634	0.0188861
RR03691	0.0497893	0.0939848	0.00952206	2.80352	0.427817			RR00111	0.0245349	0.0279616	0.014604	0.0140634	0.0188861
IR08963	0.00356524	0.00286573	0.350333	0.35972	0.00268971			IR00120	0.0245349	0.0279616	0.014604	0.0140634	0.0188861
IR04564	0.143337	0.707257	0.363654	0.698278	0.0405202			IR03486	0.0245349	0.0279616	0.014604	0.0140634	0.0188861
IR08907	0.0134018	0.0134526	0.219061	0.000100589	2.45504e-07			IR03648	0.0245349	0.0279616	0.014604	0.0140634	0.0188861
IR07898	0.0181652	0.0132185	9.69311e-07	0.00813322	0.0252695			IR00316	0.0245349	0.0279616	0.014604	0.0140634	0.0188861
IR02236	0.0134018	0.0134526	0.219061	0.000100589	2.45504e-07			IR00616	0.0245349	0.0279616	0.014604	0.0140634	0.0188861
IR00495	0.000269564	0.4643	1.1085	0.243954	0.291639			IR01046	0.0245349	0.0279616	0.014604	0.0140634	0.0188861
IR08984	0.31149	0.202953	0.292349	0.0528638	0.284095			UDPDH	0.0245349	0.0279616	0.014604	0.0140634	0.0188861
IR04100	0.0134018	0.0134526	0.219061	0.000100589	2.45504e-07			UDPRS	0.0245349	0.0279616	0.014604	0.0140634	0.0188861
IR00244	0.021868	0.520465	1.45819	0.0483646	0.00457267			RHLB2	0.0245349	0.0279616	0.014604	0.0140634	0.0188861
IR00001	0.751993	0.0351957	0.00457145	0.171089	0.43194			EX_RHLB	0.0245349	0.0279616	0.014604	0.0140634	0.0188861
IR00120	0.0245349	0.0279616	0.014604	0.0140634	0.0188861			TRA3	0.0245349	0.0279616	0.014604	0.0140634	0.0188861
IR03527	0.0243922	0.154462	0.105257	1.87047	0.0574742			IR03527	0.0243922	0.154462	0.105257	1.87047	0.0574742
IR03690	0.00615433	0.278827	4.33298e-05	5.61241	1.54072			IR00244	0.021868	0.520465	1.45819	0.0483646	0.00457267
IR03520	0.0724232	1.43132	0.0136407	0.0399196	0.348603			IR04615	0.021868	0.520465	1.45819	0.0483646	0.00457267
IR03486	0.0245349	0.0279616	0.014604	0.0140634	0.0188861			RR00689	0.0210101	0.0029435	0.000890898	0.661406	0.20228
IR01115	0.00318515	0.0204162	0.0466638	0.61959	0.516717			RR03769	0.0210101	0.0029435	0.000890898	0.661406	0.20228
IR03012	0.000269564	0.4643	1.1085	0.243954	0.291639			UDPGP	0.0201661	0.00087217	0.0633628	5.32725e-06	0.00153044
IR10069	1.24159	0.122241	4.4387	0.0282499	0.17471			RR00767	0.0195448	0.00106089	0.0139177	0.000966081	0.00992
IR03648	0.0245349	0.0279616	0.014604	0.0140634	0.0188861			RR00710	0.0195448	0.00106089	0.0139177	0.000966081	0.00992
IR00316	0.0245349	0.0279616	0.014604	0.0140634	0.0188861			RR01210	0.0195448	0.00106089	0.0139177	0.000966081	0.00992
IR10022	5.75781	0.400995	17.8614	0.123973	0.568753			IR07898	0.0181652	0.0132185	9.69311e-07	0.00813322	0.0252695
IR08910	0.0898935	0.523126	0.000504007	0.622337	6.34877			RR00146	0.01629	0.0690482	0.129555	0.0110151	0.00897484
IR02156	0.0134018	0.0134526	0.219061	0.000100589	2.45504e-07			RR09712	0.0134018	0.0134526	0.219061	0.000100589	2.45504e-07
IR08829	0.0112666	0.134732	0.0242466	0.507357	0.524315			RR04097	0.0134018	0.0134526	0.219061	0.000100589	2.45504e-07
IR04559	0.000506704	0.115485	0.00555882	0.00593047	0.0316645			RR04094	0.0134018	0.0134526	0.219061	0.000100589	2.45504e-07
IR03952	0.0134018	0.0134526	0.219061	0.000100589	2.45504e-07			RR09953	0.0134018	0.0134526	0.219061	0.000100589	2.45504e-07
IR10367	0.115135	2.60905	17.8041	0.0501703	0.448029			RR04091	0.0134018	0.0134526	0.219061	0.000100589	2.45504e-07
IR04882	0.000269564	0.4643	1.1085	0.243954	0.291639			RR04089	0.0134018	0.0134526	0.219061	0.000100589	2.45504e-07
IR03532	0.00127169	0.144319	1.27326	0.00227445	0.0137859			IR08907	0.0134018	0.0134526	0.219061	0.000100589	2.45504e-07
IR00616	0.0245349	0.0279616	0.014604	0.0140634	0.0188861			IR02236	0.0134018	0.0134526	0.219061	0.000100589	2.45504e-07
IR01114	0.00329723	0.0198985	0.0466535	0.634294	0.509239			IR04100	0.0134018	0.0134526	0.219061	0.000100589	2.45504e-07
IR00962	0.00630975	0.280756	4.30163e-05	5.65649	1.55371			IR02156	0.0134018	0.0134526	0.219061	0.000100589	2.45504e-07
IR09304	0.00630975	0.280756	4.30163e-05	5.65649	1.55371			IR03952	0.0134018	0.0134526	0.219061	0.000100589	2.45504e-07
IR00006	5.16602e-05	0.0135999	0.00292781	0.00263398	0.000773245			RR04087	0.0134018	0.0134526	0.219061	0.000100589	2.45504e-07
IR04615	0.021868	0.520465	1.45819	0.0483646	0.00457267			IR08829	0.0112666	0.134732	0.0242466	0.507357	0.524315
IR08758	0.00630975	0.280756	4.30163e-05	5.65649	1.55371			RR00685	0.0108635	3.81115	0.128674	0.885871	0.0010809
IR00522	0.000513794	0.178283	0.0364016	0.00367827	3.52461			RR00362	0.0108635	3.81115	0.128674	0.885871	0.0010809
IR08605	1.09912	0.0546955	0.240296	0.0134202	0.00825828			IR00962	0.00630975	0.280756	4.30163e-05	5.65649	1.55371
IR01046	0.0245349	0.0279616	0.014604	0.0140634	0.0188861			IR09304	0.00630975	0.280756	4.30163e-05	5.65649	1.55371
IR00455	0.0965264	0.0147028	0.0132328	0.088353	3.84102			IR08758	0.00630975	0.280756	4.30163e-05	5.65649	1.55371
IR09305	0.00630975	0.280756	4.30163e-05	5.65649	1.55371			IR09305	0.00630975	0.280756	4.30163e-05	5.65649	1.55371
IR00149	0.0283245	0.0842056	0.449307	5.81164	5.26354			IR03690	0.00615433	0.278827	4.33298e-05	5.61241	1.54072
IR00491	0.000269564	0.4643	1.1085	0.243954	0.291639			RR00131	0.00356524	0.00286573	0.350333	0.35972	0.00268971
IR00799	0.00294613	0.101479	0.950455	0.00151617	0.00810177			IR08963	0.00356524	0.00286573	0.350333	0.35972	0.00268971
EX_EC0009	0.68278	0.0185976	0.0781652	0.0812307	0.270702			IR01114	0.00329723	0.0198985	0.0466535	0.634294	0.509239
EX_EC0001	17.6509	7.97243	2.22271	0.259705	0.772266			RR00511	0.00329723	0.0198985	0.0466535	0.634294	0.509239
EX_EC0098	0.311774	0.417847	0.118128	0.0286051	12.3155			RR03001	0.00318515	0.0204162	0.0466638	0.61959	0.516717
EX_EC0957	0.68278	0.0185976	0.0781652	0.0812307	0.270702			IR01115	0.00318515	0.0204162	0.0466638	0.61959	0.516717
EX_EC0011	1.36308	3.12424	5.48531	0.370456	0.712176			IR00799	0.00294613	0.101479	0.950455	0.00151617	0.00810177
EX_EC0027	0.177625	0.158263	0.00034964	5.50583	1.98839			RR08916	0.00224387	1.1741	0.671047	0.384315	0.365933
EX_EC0080	0.200853	0.0552334	0.0327504	0.553802	0.314128			IR03532	0.00127169	0.144319	1.27326	0.00227445	0.0137859
EX_EC3745	0.0511918	0.0615169	0.196056	0.00175711	0.0266109			RR00667	0.000513794	0.178283	0.0364016	0.00367827	3.52461
EX_EC0148	0.106018	0.66168	1.16232	0.21347	0.141686			RR00519	0.000513794	0.178283	0.0364016	0.00367827	3.52461
EX_EC0065	0.123795	0.809801	0.742681	0.202222	0.1141			IR00522	0.000513794	0.178283	0.0364016	0.00367827	3.52461
EX_EC0007	5.95176	8.45602	0.0151091	0.201396	0.09611			IR04559	0.000506704	0.115485	0.00555882	0.00593047	0.0316645
UDPGP	0.0201661	0.00087217	0.0633628	5.32725e-06	0.00153044			RR01725	0.000269564	0.4643	1.1085	0.243954	0.291639
UDPDH	0.0245349	0.0279616	0.014604	0.0140634	0.0188861			RR02374	0.000269564	0.4643	1.1085	0.243954	0.291639
UDPRS	0.0245349	0.0279616	0.014604	0.0140634	0.0188861			RR01726	0.000269564	0.4643	1.1085	0.243954	0.291639
RHLB2	0.0245349	0.0279616	0.014604	0.0140634	0.0188861			RR09735	0.000269564	0.4643	1.1085	0.243954	0.291639
RSUC	0.0283245	0.0842056	0.449307	5.81164	5.26354			IR00495	0.000269564	0.4643	1.1085	0.243954	0.291639
EX_RHLB	0.0245349	0.0279616	0.014604	0.0140634	0.0188861			IR03012	0.000269564	0.4643	1.1085	0.243954	0.291639
EX_Rsuc	0.260427	0.0250086	0.483806	5.96641	6.04109			IR04882	0.000269564	0.4643	1.1085	0.243954	0.291639
TRSuc	0.260427	0.0250086	0.483806	5.96641	6.04109			IR00491	0.000269564	0.4643	1.1085	0.243954	0.291639
TRA3	0.0245349	0.0279616	0.014604	0.0140634	0.0188861			IR00006	5.16602e-05	0.0135999	0.00292781	0.00263398	0.000773245

## Sheet: PCA - Variables Contributions
	PC1	PC2	PC3	PC4	PC5
Glucose	17.733	10.6692	0.0006613	56.1569	15.396
Fructose	19.7477	4.08643	0.462506	4.85234	3.273
Sucrose	19.1672	1.4673	4.92929	34.8923	29.01
Benzoate	11.4313	46.8679	34.4726	3.88924	3.1
Glycerol	18.2083	10.8035	0.978159	0.101351	48.304
Myristic Acid	13.7126	26.1056	59.1568	0.107879	0.917
