# Supplementary material for: In silico engineering of Pseudomonas metabolism reveals new biomarkers for increased biosurfactant production
Source: PeerJ. 2018 Dec 17;6:e6046. doi: 10.7717/peerj.6046 (PMC6301282; doi:10.7717/peerj.6046)
Supplement: Supplemental Information 6 [file peerj-06-6046-s006.xlsx]

## Sheet: DARs
Differentially Active Reactions	Pathways	p-value
3-Aminopropanoate:2-oxoglutarate aminotransferase	Fatty acid biosynthesis	0.00423514
L-Alanine:3-oxopropanoate aminotransferase	Purine metabolism	0.00425958
4a-hydroxytetrahydrobiopterin dehydratase	Benzoate degradation via hydroxylation	0.00664694
NADH:6,7-dihydropteridine oxidoreductase	Pyrimidine metabolism	0.0341366
L-Phenylalanine,tetrahydrobiopterin:oxygen oxidoreductase(4-hydroxylating)	Folate biosynthesis	0.0341366
L-Cystathionine Lysteine-lyase (deaminating) (R)	Porphyrin and chlorophyll metabolism	0.0355165
4-Hydroxyphenylpyruvate:oxygen oxidoreductase(hydroxylating,decarboxylating)	Exchange	0.0378154
Homogentisate:oxygen 1,2-oxidoreductase (decyclizing)	Exchange	0.0378155
4-Maleylacetoacetate cis-trans-isomerase	Exchange	0.0378155
4-Fumarylacetoacetate fumarylhydrola (R)	Exchange	0.0378156
L-Tyrosine:2-oxoglutarate aminotransferase	Purine metabolism	0.0400105
arginine/ornithine antiporter	Benzoate degradation via hydroxylation	0.0429227
3-Dehydroquinate hydro-lyase	Exchange	0.0485901
2-Dehydro-3-deoxy-D-arabino-heptonate 7-phosphate phosphate-lyase(cyclyzing)	Exchange	0.0486175
Phosphoenolpyruvate:D-erythrose-4-phosphateC-(1-carboxyvinyl)transferase (phosphate hydrolysing,2-carboxy-2-oxoethyl-forming)	Glycine, serine and threonine metabolism	0.0486175
